# Supplementary material
Source: HighWire-hosted journal article supplement (http://injuryprevention.bmj.com/highwire/filestream/145463/field_highwire_adjunct_files/0/ip_mcpherson_table_.pdf)
Supplement: ip_mcpherson_table_.pdf [file ip_mcpherson_table_.pdf]

Table 1 Number of children observed and rate of cyclists per hour by year

|               | 1993           |      | 1994           |      | 1995           |      | 1996           |       | 1997           |      | 1999           |       |
|---------------|----------------|------|----------------|------|----------------|------|----------------|-------|----------------|------|----------------|-------|
|               | No of children | Rate  | No of children | Rate | No of children | Rate  |
| Schools       | 400            | 9.32 | 602            | 8.47 | 178            | 5.12 | 332            | 10.33 | 336            | 8.78 | 162            | 7.71  |
| Parks         | 153            | 5.67 | 158            | 5.45 | 255            | 4.52 | 408            | 10.48 | 238            | 4.65 | 351            | 11.70 |
| Streets       | 119            | 5.60 | 92             | 4.60 | 222            | 4.32 | 174            | 5.40  | 151            | 4.10 | 232            | 11.60 |
| Intersections | 222            | 6.21 | 188            | 4.58 | 401            | 3.83 | 285            | 3.71  | 184            | 2.58 | 383            | 9.34  |
| All sites     | 894            | 6.58 | 1040           | 5.54 | 1056           | 4.32 | 1199           | 6.84  | 909            | 4.57 | 1128           | 10.07 |

**Correction to the results section.**

The statistical significance of some of the results changed with the correction to the number of cyclists. In particular:

In 1996, the year after legislation came into effect cycling levels were somewhat higher (6.84 cyclists per hour) than in 1995 (difference between means 2.51; 95% confidence interval -0.32 to 5.36).

The rate of children cycling to school did not change significantly throughout the study period. In the year after legislation was introduced, there was a slight increase in the number of children cycling in parks compared with 1995 (difference between means 5.95; 95% CI -0.63 to 12.54). The rate of children seen cycling at major intersections declined slightly from 1995-1996 (difference between means -0.13; 95% CI -3.16 to 2.91).

**Correction to the Discussion, paragraph 2.**

The sentence should read:

A change in the location of child cyclists was observed in the year after the introduction of legislation. (remove the word 'significant').
